# Supplementary material for: Accelerometer measurement of upper extremity movement after stroke: a systematic review of clinical studies
Source: PubMed Central journal article supplement (PMC4197318; doi:10.1186/1743-0003-11-144), 2014-10-09
Supplement: 12984_2014_663_MOESM1_ESM.pdf [file 12984_2014_663_MOESM1_ESM.pdf]

Identification

MEDLINE  
n=170

Scopus  
n=589

IEEEExplore  
n=293

Compendex  
n=323

Screening

Screening based on title and abstract

n=10

n=11

n=3

n=1

Eligibility

7 duplicates  
removed

Eligibility based on full-text articles

n=8

n=0

n=0

n=0

Included

8 studies included
